# Supplementary material
Source: ML conference proceedings conference paper supplement (https://openreview.net/forum?id=CLTEaA2mtC)
Supplement: supplementary_material [file attachment]

Original

Ground Truth

1%

10%

50%

100%

1 inst.

35 inst.

1 inst.

35 inst.

1 inst.

35 inst.

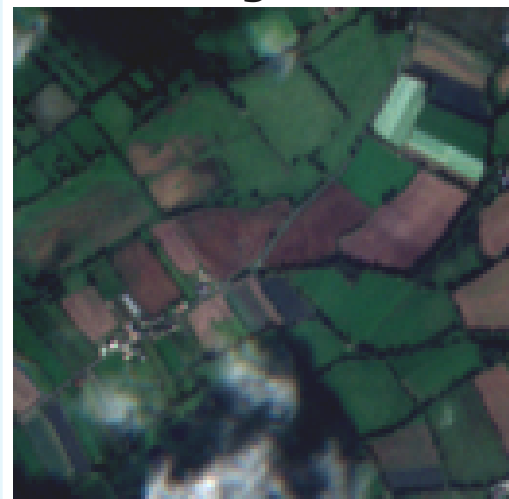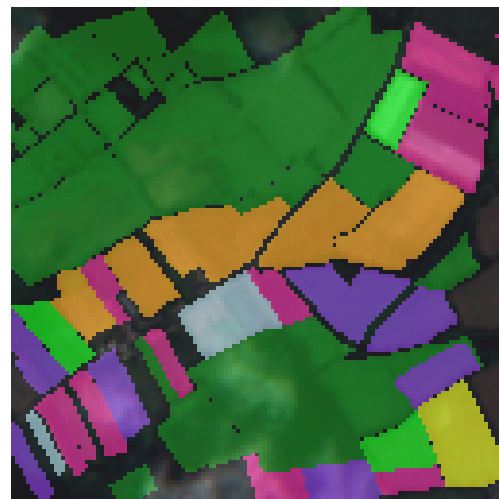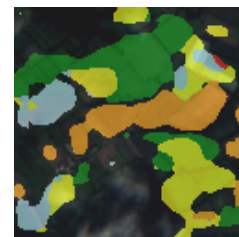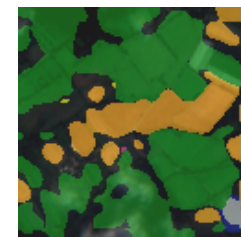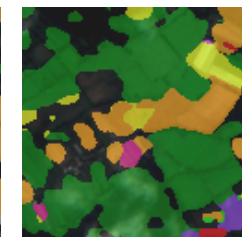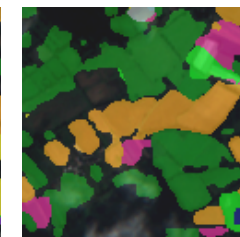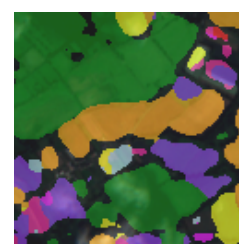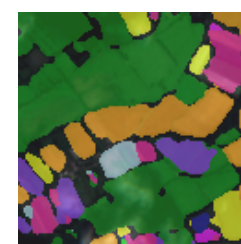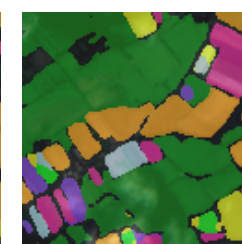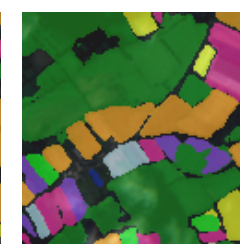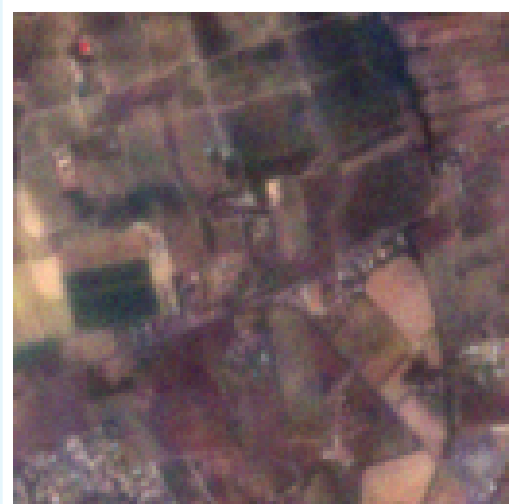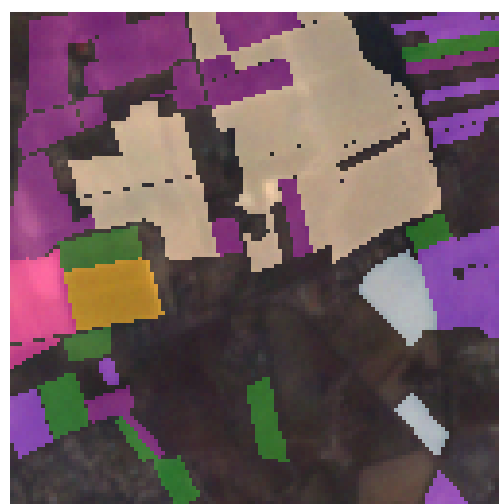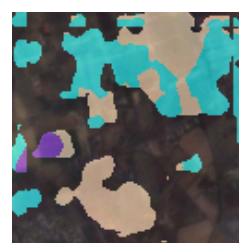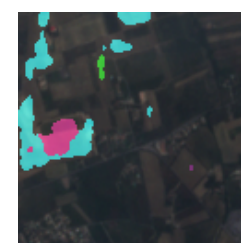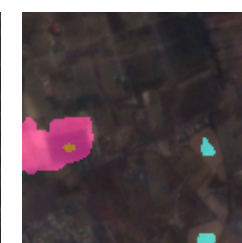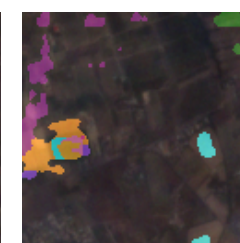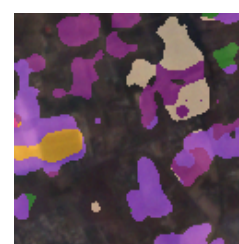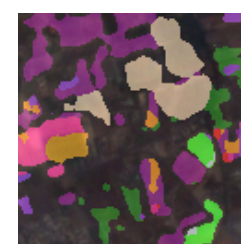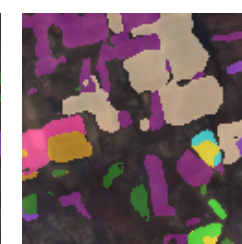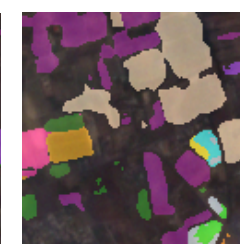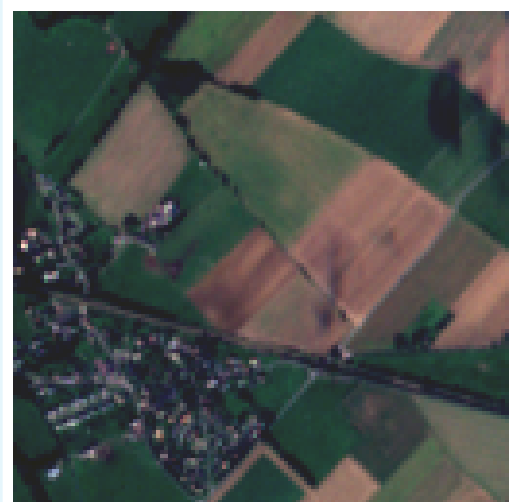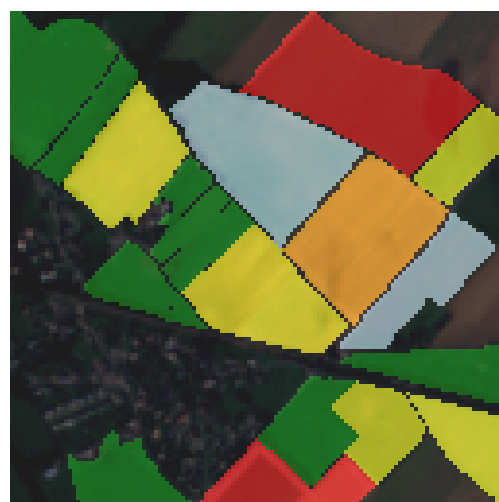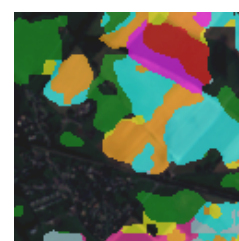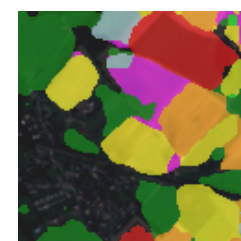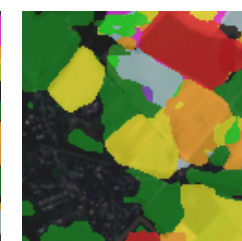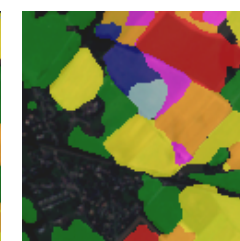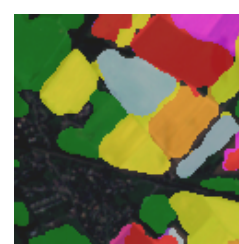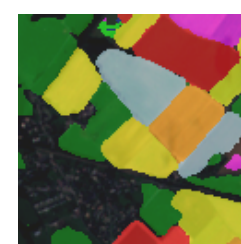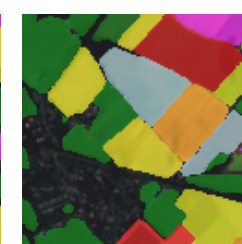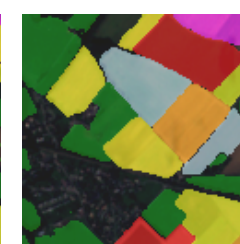

Background  
Meadow  
Soft Winter Wheat

Corn  
Winter Barley  
Winter Rapeseed

Spring Barley  
Sunflower  
Grapevine

Beet  
Winter Triticale  
Winter Durum Wheat

Fruits/Vegs./Flowers  
Potatoes  
Leguminous Fodder

Soybeans  
Orchard  
Mixed Cereal

Sorghum
