# Supplementary material
Source: ML conference proceedings conference paper supplement (https://openreview.net/forum?id=CLTEaA2mtC)

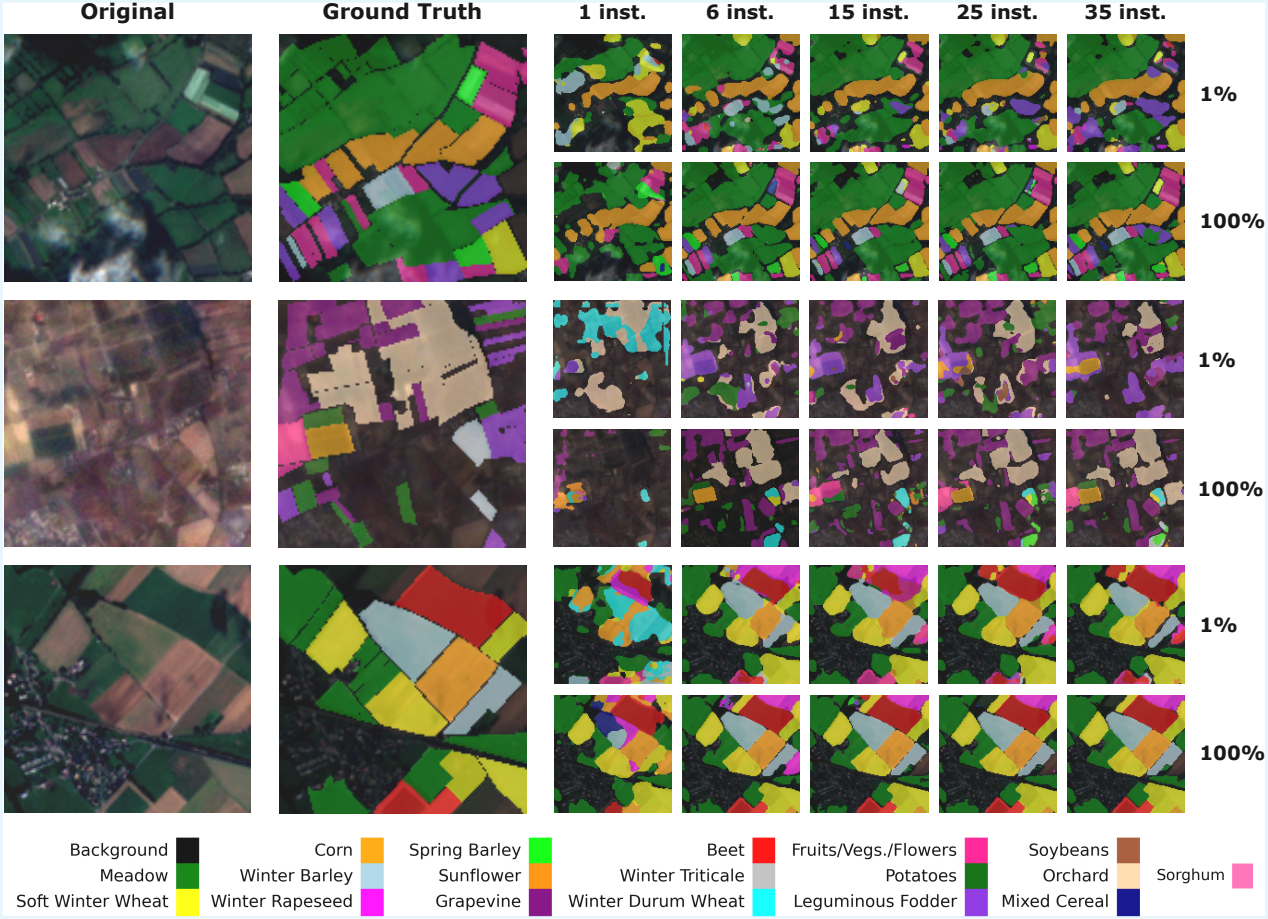

Supplement: supplementary_material [file attachment]

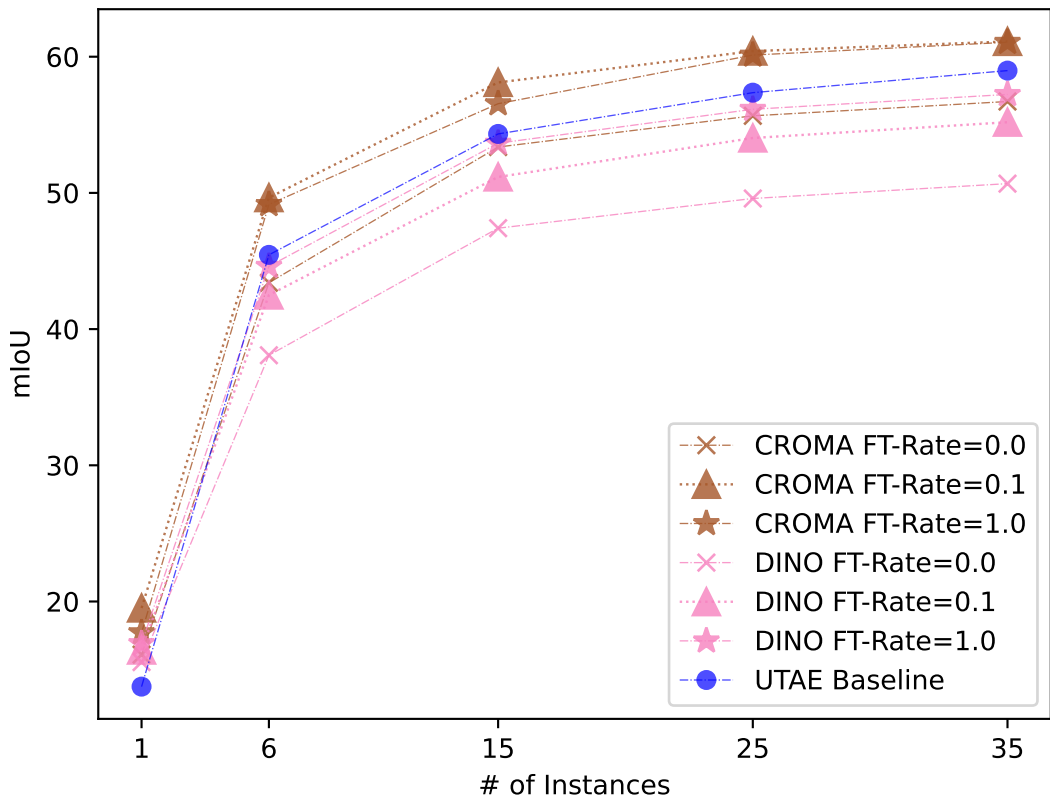

Supplement: supplementary_material [file attachment]

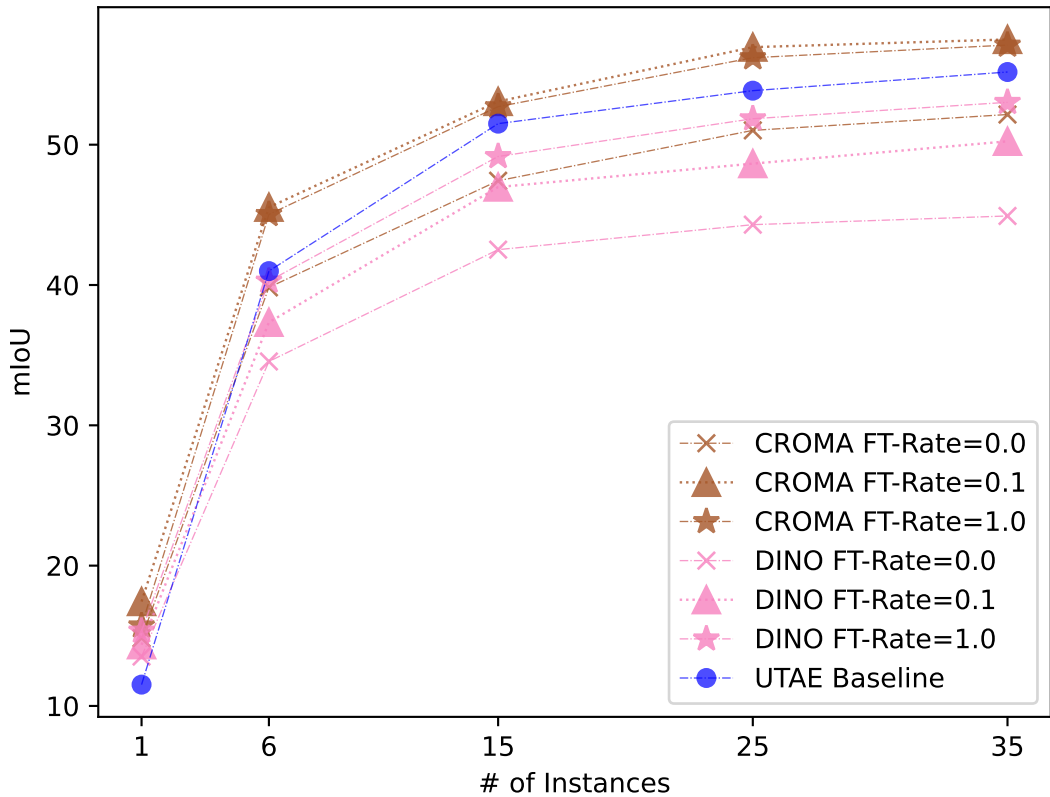

Supplement: supplementary_material [file attachment]

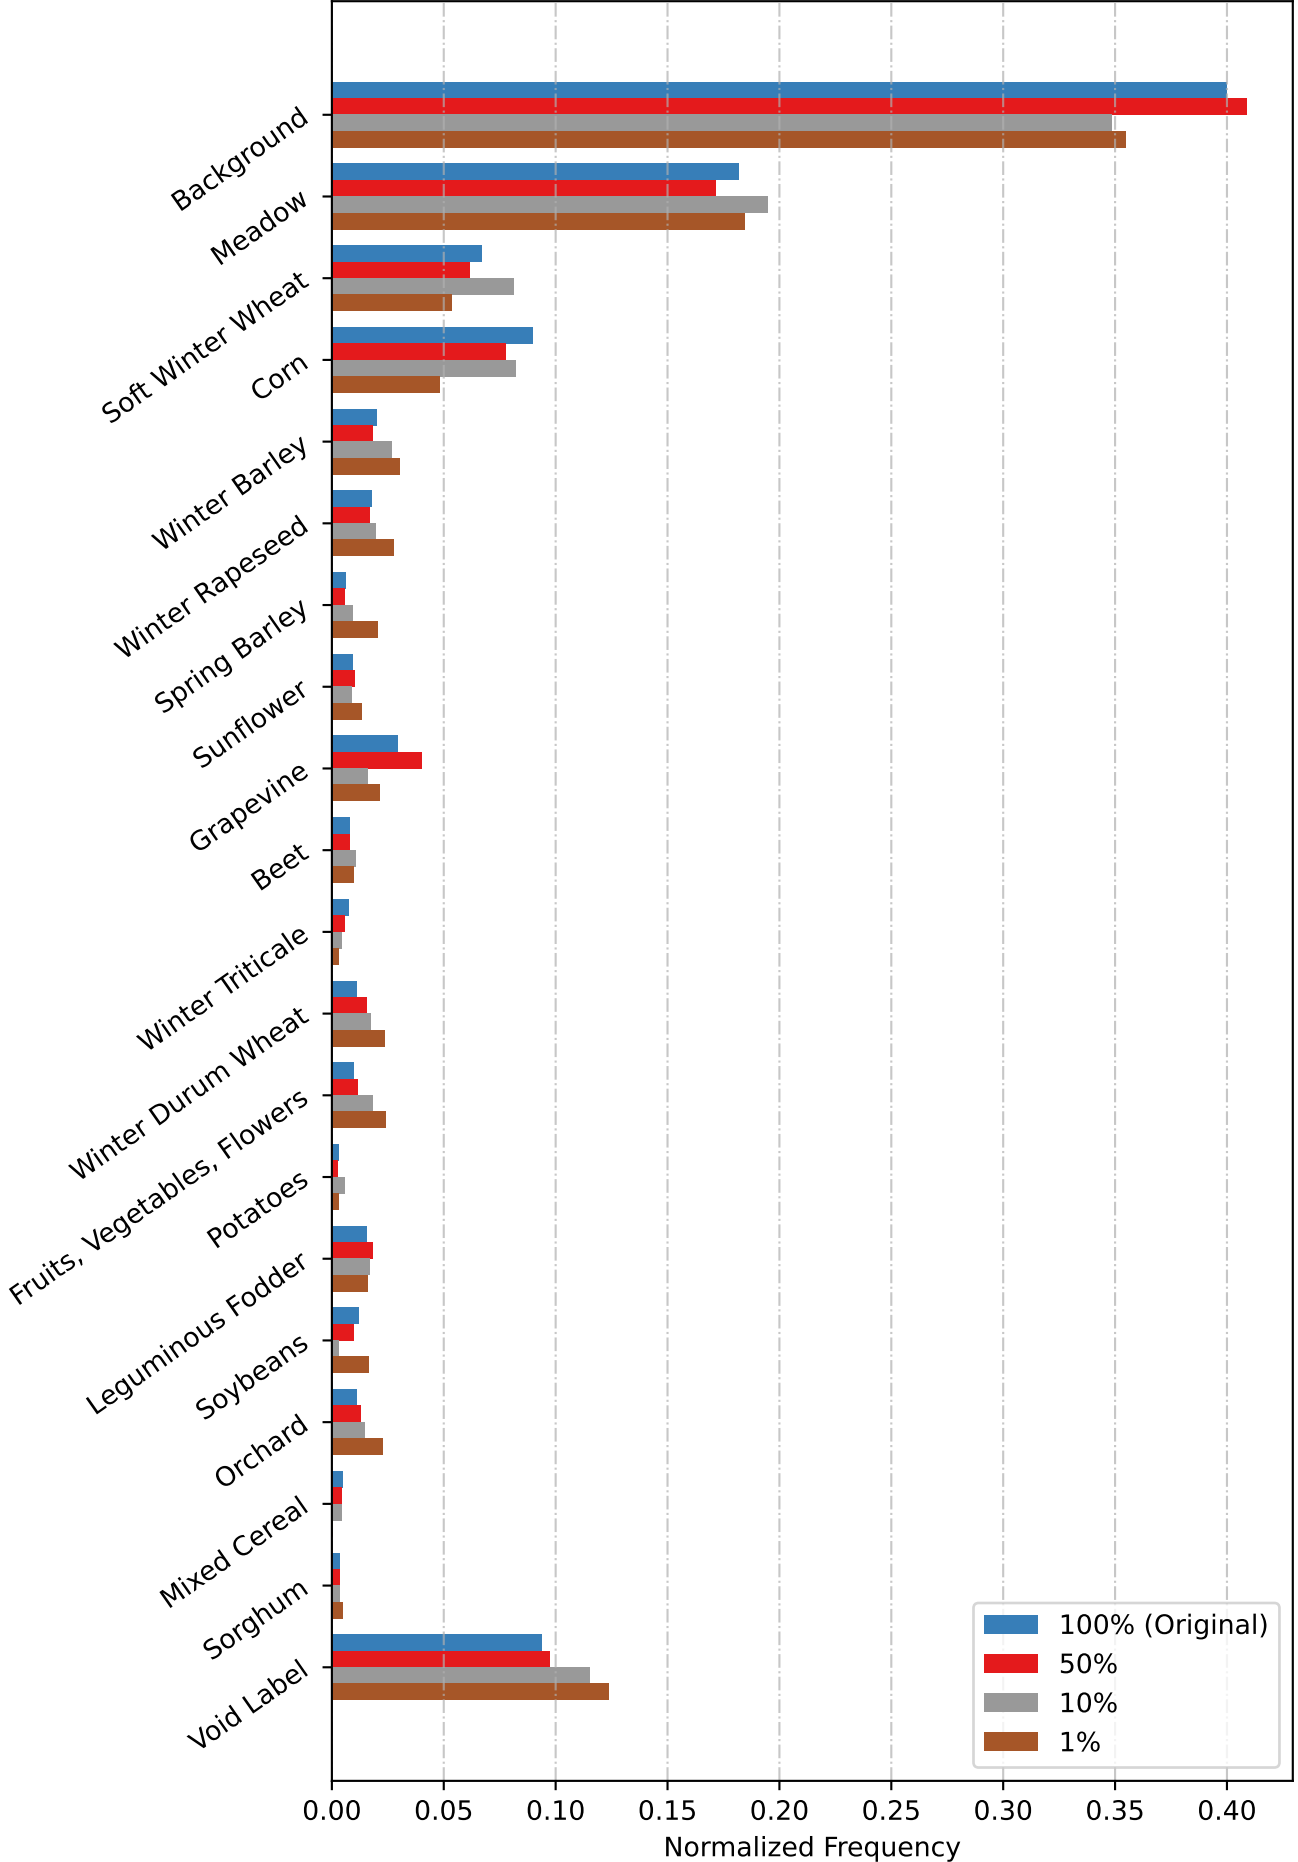

Supplement: supplementary_material [file attachment]

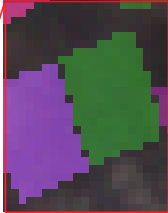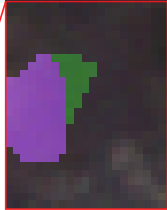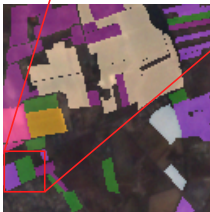

**Ground Truth**

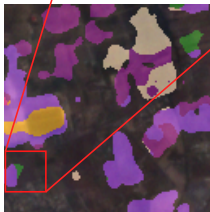

**1% 35 inst.**

Supplement: supplementary_material [file attachment]

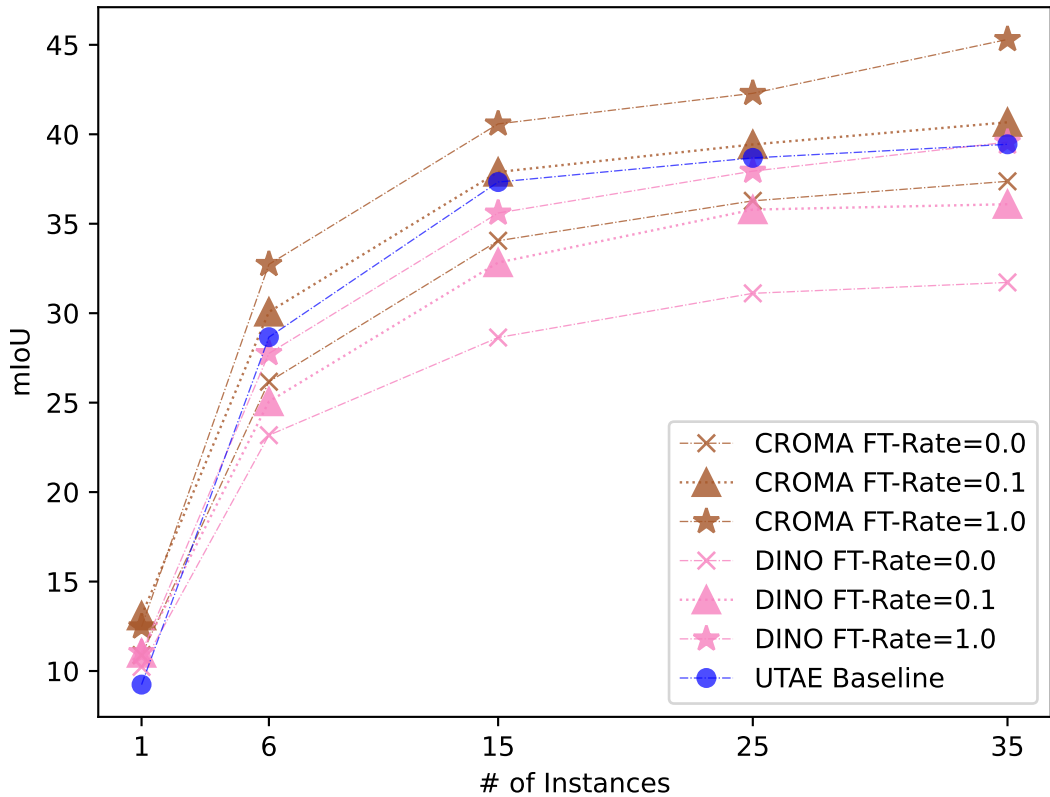

Supplement: supplementary_material [file attachment]

100%

1 inst.

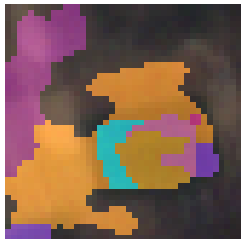

6 inst.

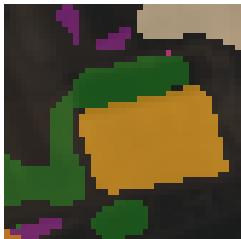

15 inst.

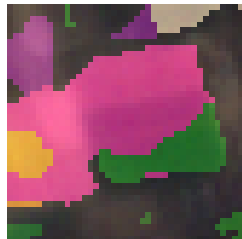

25 inst.

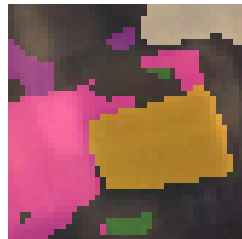

35 inst.

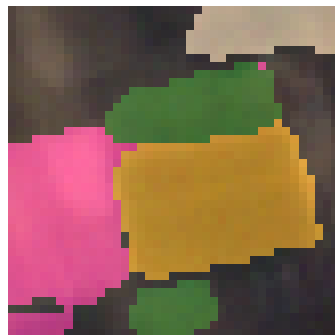

100%

Ground Truth

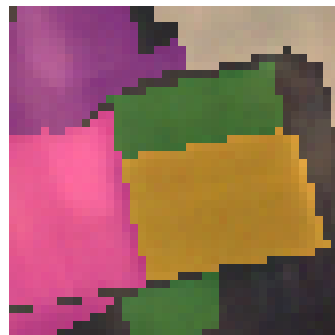

35 inst.

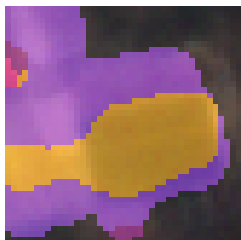

1%

10%

50%

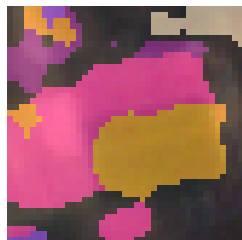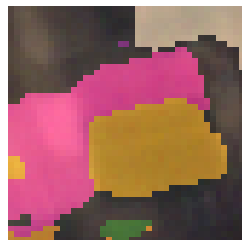

Supplement: supplementary_material [file attachment]

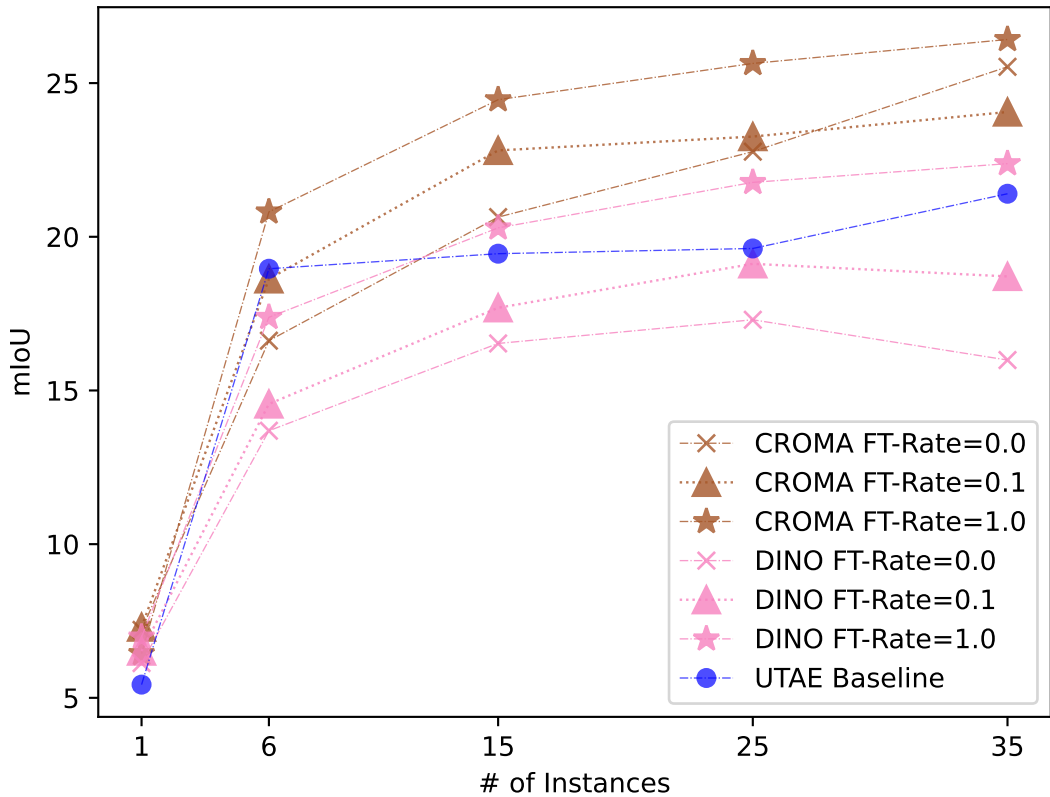

Supplement: supplementary_material [file attachment]
